# Supplementary material
Source: PubMed Central journal article supplement (PMC4423374)
Supplement: supp_115.174920_174920SI.pdf [file supp_115.174920_174920SI.pdf]

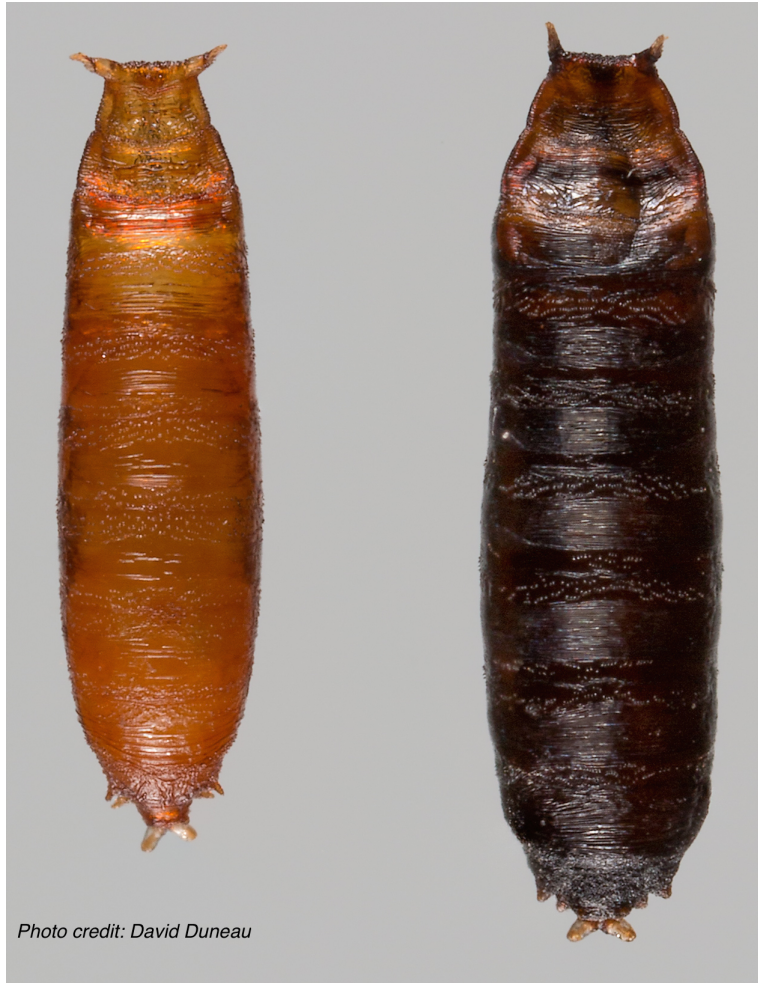

**Figure S1:** *D. americana* (left) and *D. virilis* (right) pupae at stage 3 (see Materials and Methods).

---

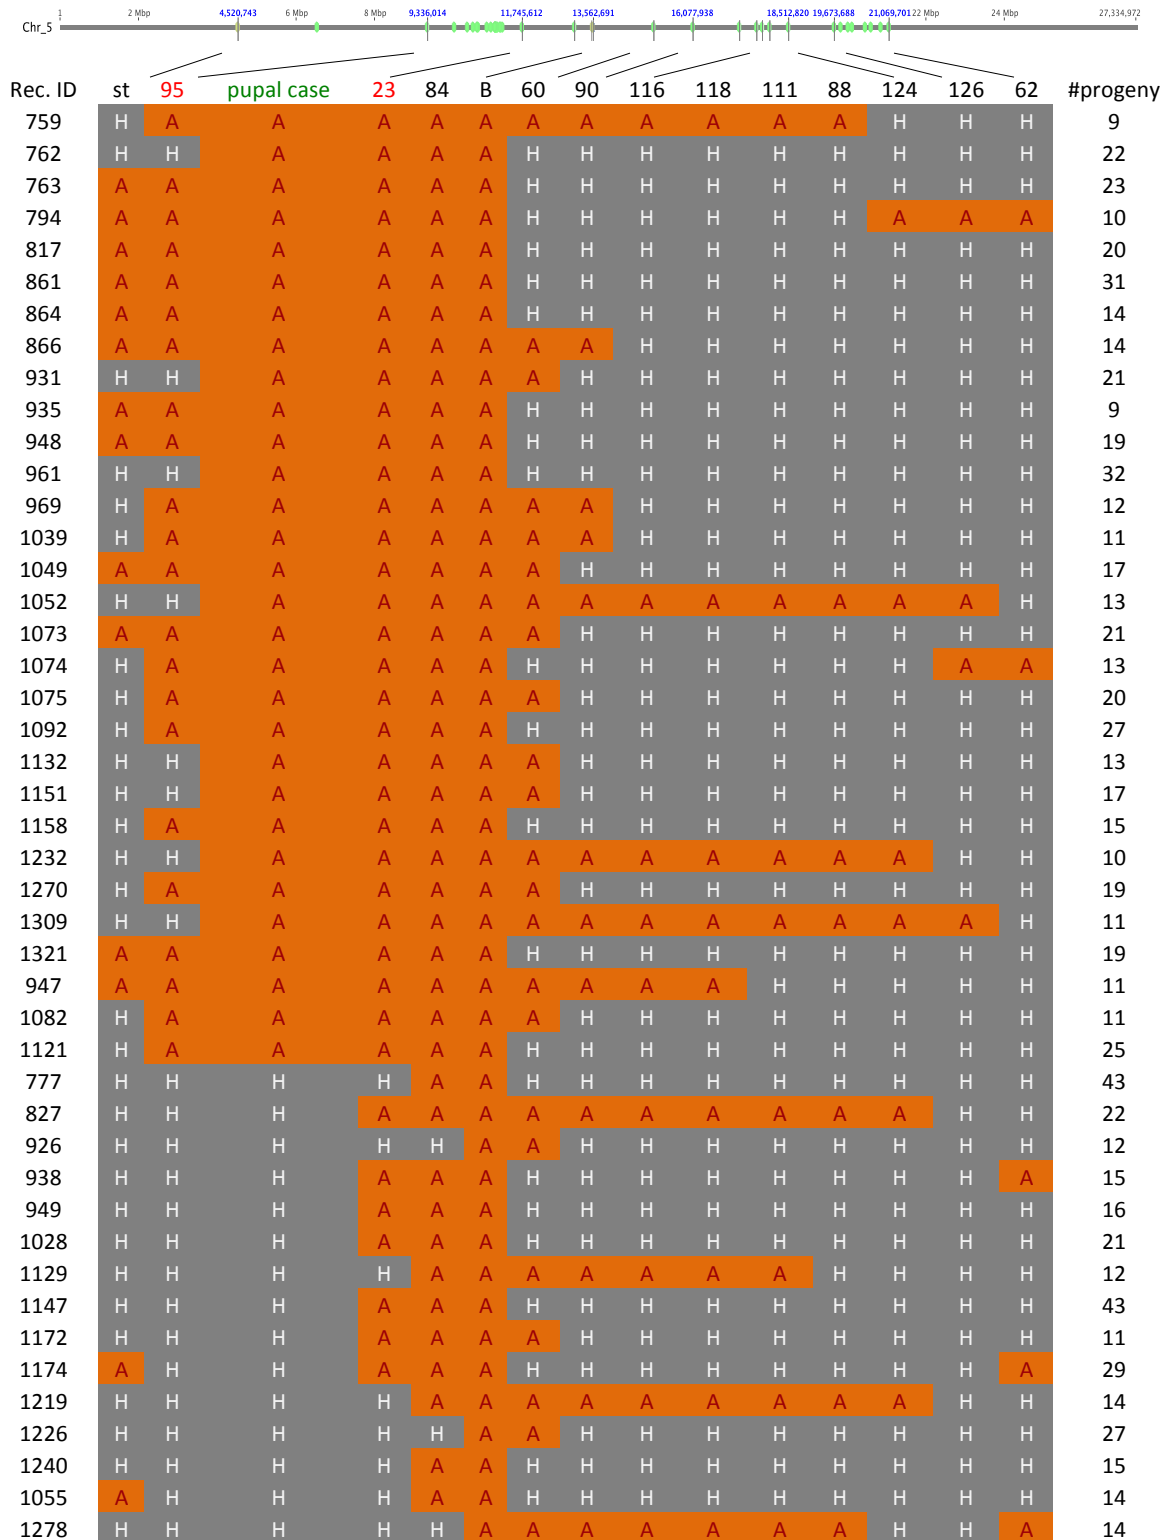

**Figure S2:** Genotype table of recombinant backcross males from the first round of genotyping (see Materials and Methods). Genotypes at each marker are indicated by letter and color (orange/A = *D. americana* homozygote, gray/H = heterozygote). Pupal case genotype is inferred from progeny pupal case colors and is indicated at the putative location (green) between markers SSR95 and SSR23 (red).

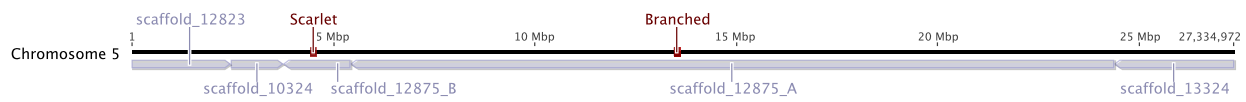

**Figure S3:** Correspondence of *D. virilis* genome scaffolds (release droVir2, UCSC) to chromosome 5 (Muller Element C; Schaffer *et al.* 2008).

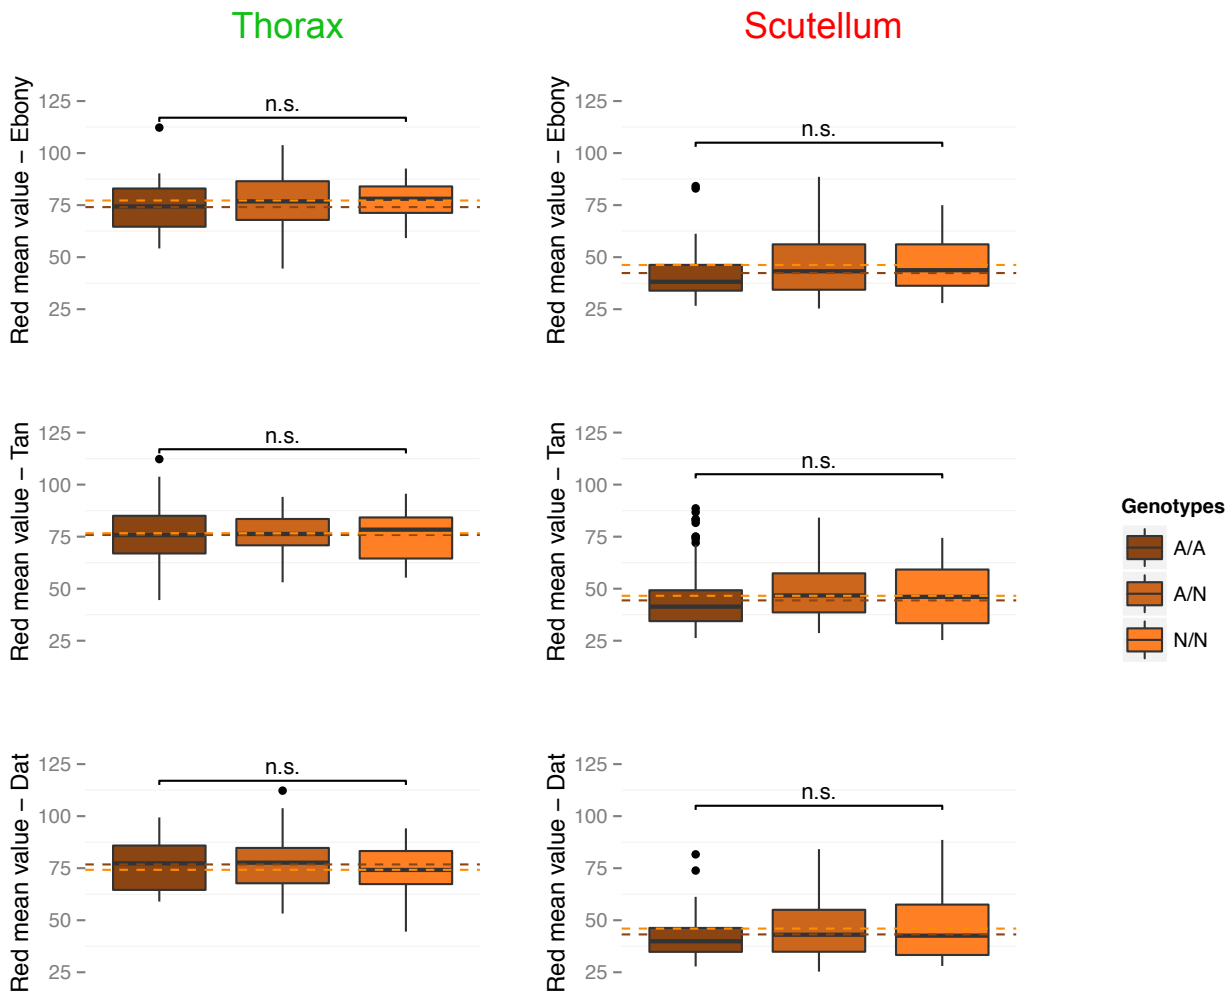

**Figure S4:** Boxplot distribution of mean red values in the thorax and scutellum across genotypes for the three pigmentation genes surveyed: Red mean values are partitioned into the three genotypic classes recovered in the F6 population (n=188). Dashed horizontal lines indicate the mean read value for A/A (brown) and N/N (orange) genotypes.

**Table S1:** List of genetic markers used in this study, their coordinates, and primer sequences.

| Name(type*)        | Chr_5 coords.     | scaffold_12875 coords. | Forward primer        | Reverse primer         |
|--------------------|-------------------|------------------------|-----------------------|------------------------|
| <b>St (VM)</b>     | 4519096-4520743   | 922609-924256          | N/A                   | N/A                    |
| <b>SSR58 (MS)</b>  | 6545087-6545300   | 19509634-19509847      | TGCCTAGCATTTGGCACTTA  | AAAAGAGCGTGGCAAAGAAA   |
| <b>SSR95 (MS)</b>  | 9335798-9336014   | 16718920-16719136      | TGTGCCTGCTGACAAAACAT  | ACACTGCCTGCTTGCAATTA   |
| <b>SSR138 (MS)</b> | 10017486-10017694 | 16037240-16037448      | TCGTACCAATGTTGTCAATGC | ACAGGAAGTGGGTGGAAGTG   |
| <b>SSR139 (MS)</b> | 10361473-10361687 | 15693247-15693461      | CAAAGATGGAGGAAGCCTCA  | CCAGCGCACACTCATAGATT   |
| <b>SSR157 (MS)</b> | 10504504-10504720 | 15550214-15550430      | TTTCGTTTGCAATTCCTGTG  | GCGTTCGAACCTGAACAAAT   |
| <b>SSR155 (MS)</b> | 10604771-10604976 | 15449958-15450163      | TGGGACAAATGTGCCAAATA  | ATATGCTCGGTGCGGAGATTC  |
| <b>SSR154 (MS)</b> | 10621121-10621371 | 15433563-15433813      | CGGGCAGAATCAACTCGTAG  | CCGCAGACACTGAACCAAC    |
| <b>SSR150 (MS)</b> | 10864161-10864552 | 15190382-15190773      | GCTATGTTTGCTGGCAGTGA  | ATTGCCAAAGCGCATAAATA   |
| <b>SSR149 (MS)</b> | 10955634-10955876 | 15099058-15099300      | CAGTACATCGGGCAATTGTG  | TGTGGGTGAAGTCAATGTTGT  |
| <b>SSR148 (MS)</b> | 11054476-11054716 | 15000218-15000458      | ACGTGCCACATTGCTCATA   | ACAACCTGTCGCGCACTAAA   |
| <b>SSR170 (MS)</b> | 11062637-11062844 | 14992090-14992297      | TTTTTCGTTTCTCCGTTTTT  | ATCTAAGCAAGCGGGTTTCA   |
| <b>SSR169 (MS)</b> | 11067738-11067901 | 14987033-14987196      | CATCAAGGAGCTGGCCTATC  | ACTTCTCCGCGTACAACCTG   |
| <b>SSR168 (MS)</b> | 11080856-11080998 | 14973936-14974078      | CTCCTGGCTGAAAAGCAAAC  | CGGCAAAACAAATGACAATC   |
| <b>SSR165 (MS)</b> | 11083472-11083698 | 14971236-14971462      | TTTGACCAGGGCATGACATA  | AAGCACAAGCAAAGCACACAC  |
| <b>SSR167 (MS)</b> | 11086448-11086593 | 14968341-14968486      | TTCGAATTTCCGCTTGATTT  | TATAGCCGGCTCGTTGAAGT   |
| <b>pF10 (SNP)</b>  | 11089640-11089848 | 14965086-14965294      | AGCTTTAGCTTCCCTTGTC   | TTGAAATTTGCGCGTCTAC    |
| <b>pE10 (SNP)</b>  | 11090368-11090570 | 14964364-14964566      | CGCGATCGCAGCTATTCTT   | TCCAGATGTGCGGTGAAGTGT  |
| <b>pD10 (SNP)</b>  | 11091748-11091976 | 14962958-14963186      | TCGACGACGACATATTGAGC  | GTCTGGCTTTCATCTAAGAGCA |
| <b>pC10 (SNP)</b>  | 11093207-11093456 | 14961478-14961727      | AGGGATCGGCCAATTATC    | AAACCCCTCAAGGACAACCTG  |
| <b>pB10 (SNP)</b>  | 11095456-11095683 | 14959251-14959478      | TACGCAACGCCTATCTGAAA  | TCAAGCTGTCGTGTAATCC    |
| <b>pA10 (SNP)</b>  | 11096841-11097053 | 14957881-14958093      | GATCGTCGCGACTTTCCTA   | CGATGGGCAATAATATGGAG   |
| <b>SSR164 (MS)</b> | 11099701-11099906 | 14955028-14955233      | TTGTGTTGTGCTGATGCTG   | GCAAAGCAAAGCTGCGTA     |
| <b>SSR147 (MS)</b> | 11129608-11129795 | 14925139-14925326      | TTAGGCGCTGCTACTCACAC  | GCGTACAGCTGATAAGCACAG  |
| <b>SSR163 (MS)</b> | 11179710-11179876 | 14875058-14875224      | TCAATGCACGAAAATTGGTC  | GTTGCGGTAAAATGGATTCCG  |
| <b>SSR162 (MS)</b> | 11205769-11205921 | 14849013-14849165      | AGGTAATGTTGGCCAATGC   | TTCGAAAGGCATTTTGTGA    |
| <b>SSR146 (MS)</b> | 11245420-11245584 | 14809350-14809514      | GTGACAATTGTTGCGGAGTG  | CGCCGTCTGAAAAGAGAAAAC  |
| <b>SSR23 (MS)</b>  | 11745404-11745612 | 14309322-14309530      | AAACTGGCAGATGGGCATAG  | CCACGATTTGAGAAGCACAA   |
| <b>SSR84 (MS)</b>  | 13073885-13074040 | 12980894-12981049      | CAGCATGGAGCATCTGTGTC  | TGGAAGGGATGTCATGGACT   |
| <b>B (VM)</b>      | 13512463-13562691 | 12492265-12542347      | N/A                   | N/A                    |
| <b>SSR60 (MS)</b>  | 15084664-15084836 | 10970098-10970270      | CAAAAGTGTGCTTGATGG    | GGGTTCTAGCCCCAAATAA    |
| <b>SSR90 (MS)</b>  | 16077689-16077938 | 9976996-9977245        | ACTTTGCCAAGCTGTGAAGG  | GCGTCTCGTATGCTCTGCTA   |
| <b>SSR116 (MS)</b> | 17269263-17269460 | 8785474-8785671        | CCCCATTGAAAGTTCATCCA  | GTCAGGAGGCCACATTGTTT   |
| <b>SSR118 (MS)</b> | 17695072-17695271 | 8359663-8359862        | GCCCAAAATCTTAGCCAAA   | TGGCTTGGGTACTGTTTCT    |
| <b>SSR111 (MS)</b> | 17849127-17849347 | 8205587-8205807        | TTTGATTGTTTCCCTCACTCG | TGTCATTGCTCTGGCAAAA    |
| <b>SSR88 (MS)</b>  | 18040111-18040269 | 8014665-8014823        | CCAAAAGGCAGGACCATAAA  | TTGCGTAGACACCACAAGGT   |
| <b>SSR124 (MS)</b> | 18512607-18512820 | 7542114-7542327        | CGCTTAAACGATCCAACGAT  | GTTTATAACCGGTGCTCGAT   |
| <b>SSR126 (MS)</b> | 19673479-19673688 | 6381246-6381455        | AATTGCCAAAGAAACCACCA  | AGCGGCTCGTCTGCTGTA     |
| <b>SSR128 (MS)</b> | 19839381-19839552 | 6215382-6215553        | ACGACTTGTGCTGATAGGC   | CTGTTCTGGAACATGCAAGC   |
| <b>SSR129 (MS)</b> | 20026180-20026357 | 6028577-6028754        | ACCATGAGCAGGCATCAGA   | CCGGCAATCGTCTTTAACT    |
| <b>SSR130 (MS)</b> | 20129136-20129321 | 5925613-5925798        | ACACAGGTCCCAACACAACA  | CAGAAAATGATGTGCGTCTG   |
| <b>SSR133 (MS)</b> | 20473430-20473645 | 5581289-5581504        | CTCGCAACTTGGCAGACATA  | TGCCCAAATGTAAGTGTATC   |
| <b>SSR134 (MS)</b> | 20601881-20602035 | 5452899-5453053        | GCACCGCCATACCCATAAT   | ATTTGGCCACCCATTAGACC   |
| <b>SSR136 (MS)</b> | 20858440-20858624 | 5196310-5196494        | ATGCCAAACAATGCTAAACA  | TCCCGATGATCATTGTCTT    |
| <b>SSR62 (MS)</b>  | 21069407-21069701 | 4985233-4985527        | TGTTAGTTGGCAGCGCAAT   | GATTATGCGTGTGCGAGTCG   |

\*VM: visible marker, MS: microsatellite marker, SNP: single nucleotide polymorphism.

**Table S2:** Statistical analysis of RT-qPCR results. Two sample *t*-tests (one-tailed) for each relevant comparison are shown. Significant *p*-values (<0.05) are indicated in red.

| Samples compared (isoform) | t-value | <i>p</i> -value | Associated figure |
|----------------------------|---------|-----------------|-------------------|
| Apré v. Vpre (A)           | 17.54   | <0.00001        | 5b                |
| Apup v. Vpup (A)           | 35.19   | <0.00001        | 5b                |
| Apos v. Vpos (A)           | 5.69    | 0.00046         | 5b                |
| Apré v. Vpre (B)           | 4.63    | 0.00169         | 5b                |
| Apup v. Vpup (B)           | 0.31    | 0.76582         | 5b                |
| Apos v. Vpos (B)           | 2.99    | 0.01739         | 5b                |
| Apré v. F1pre (A)          | 1.49    | 0.13674         | 5c                |
| Apup v. F1pup (A)          | 0.27    | 0.40072         | 5c                |
| Apos v. F1pos (A)          | 2.21    | 0.07916         | 5c                |
| Vpre v. F1pre (A)          | 7.29    | 0.00915         | 5c                |
| Vpup v. F1pup (A)          | 25.46   | 0.00081         | 5c                |
| Vpos v. F1pos (A)          | 2.88    | 0.05133         | 5c                |
| Apos v. F3Br (A)           | 2.05    | 0.05457         | 5c                |
| Vpos v. F3Bl (A)           | 2.45    | 0.06719         | 5c                |
| Apré v. Npre (A)           | 1.67    | 0.11882         | 5d                |
| Apup v. Npup (A)           | 1.91    | 0.09801         | 5d                |
| Apos v. Npos (A)           | 1.89    | 0.10008         | 5d                |
| Apré v. Lpre (A)           | 7.92    | 0.00778         | 5d                |
| Apup v. Lpup (A)           | 29.88   | 0.00056         | 5d                |
| Apos v. Lpos (A)           | 32.38   | 0.00048         | 5d                |
| Lpre v. Npre (A)           | 13.38   | 0.00277         | 5d                |
| Lpup v. Npup (A)           | 36.6    | 0.00037         | 5d                |
| Lpos v. Npos (A)           | 8.02    | 0.00761         | 5d                |
| Lpre v. Vpre (A)           | 0.23    | 0.42108         | 5d                |
| Lpup v. Vpup (A)           | 2.72    | 0.05652         | 5d                |
| Lpos v. Vpos (A)           | 2.84    | 0.05235         | 5d                |

**Table S3:** Statistical analysis of adult pigmentation between *D. americana* and *D. novamexicana*. One-way ANOVA was performed for genotype at each of the three genes and mean red value at three adult landmarks. Significant *p*-values (<0.05) are indicated in red.

| <b>Tukey HSD adjusted <i>p</i>-value</b> |                 |                |                   |            |            |            |
|------------------------------------------|-----------------|----------------|-------------------|------------|------------|------------|
| <b>Gene</b>                              | <b>Landmark</b> | <b>F value</b> | <b>Pr (&gt;F)</b> | <b>N-A</b> | <b>H-A</b> | <b>N-H</b> |
| <b><i>ebony</i></b>                      | Abdomen         | 4.969          | 0.00244           | 0.00221    | 0.0389     | 0.31829    |
|                                          | Scutellum       | 0.799          | 0.496             | 0.59866    | 0.46525    | 0.99959    |
|                                          | Thorax          | 0.558          | 0.644             | 0.61987    | 0.74585    | 0.96329    |
| <b><i>tan</i></b>                        | Abdomen         | 4.85           | 0.00285           | 0.12649    | 0.07594    | 0.00205    |
|                                          | Scutellum       | 0.935          | 0.425             | 0.89283    | 0.4431     | 0.91896    |
|                                          | Thorax          | 0.177          | 0.912             | 0.99757    | 0.99912    | 0.99423    |
| <b><i>Dat</i></b>                        | Abdomen         | 0.162          | 0.922             | 0.93054    | 0.98801    | 0.97699    |
|                                          | Scutellum       | 0.17           | 0.916             | 0.94041    | 0.89818    | 0.99981    |
|                                          | Thorax          | 0.692          | 0.558             | 0.66698    | 0.99866    | 0.55199    |

References:

Schaeffer, S. W. *et al.*, 2008 Polytene Chromosomal Maps of 11 *Drosophila* Species: The Order of Genomic Scaffolds Inferred From Genetic and Physical Maps. *Genetics* 179:1601-1655.

**File S1**

**Nucleotide alignment in FASTA format.**

Available for download at <http://www.genetics.org/lookup/suppl/doi:10.1534/genetics.115.174920/-/DC1>
