# Supplementary material
Source: PubMed Central journal article supplement (PMC4423374)
Supplement: supp_115.174920_FigureS1.pdf [file supp_115.174920_FigureS1.pdf]

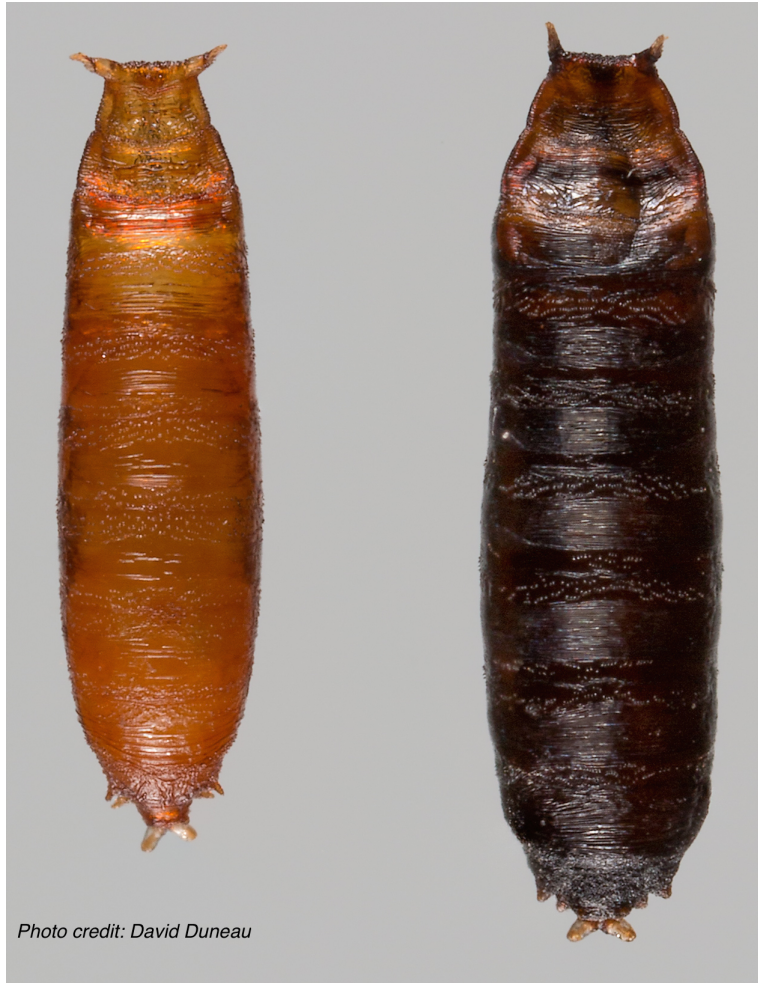

Photo credit: David Duneau

**Figure S1:** *D. americana* (left) and *D. virilis* (right) pupae at stage 3 (see Materials and Methods).

---
