# Supplementary material
Source: PubMed Central journal article supplement (PMC4423374)
Supplement: supp_115.174920_FigureS2.pdf [file supp_115.174920_FigureS2.pdf]

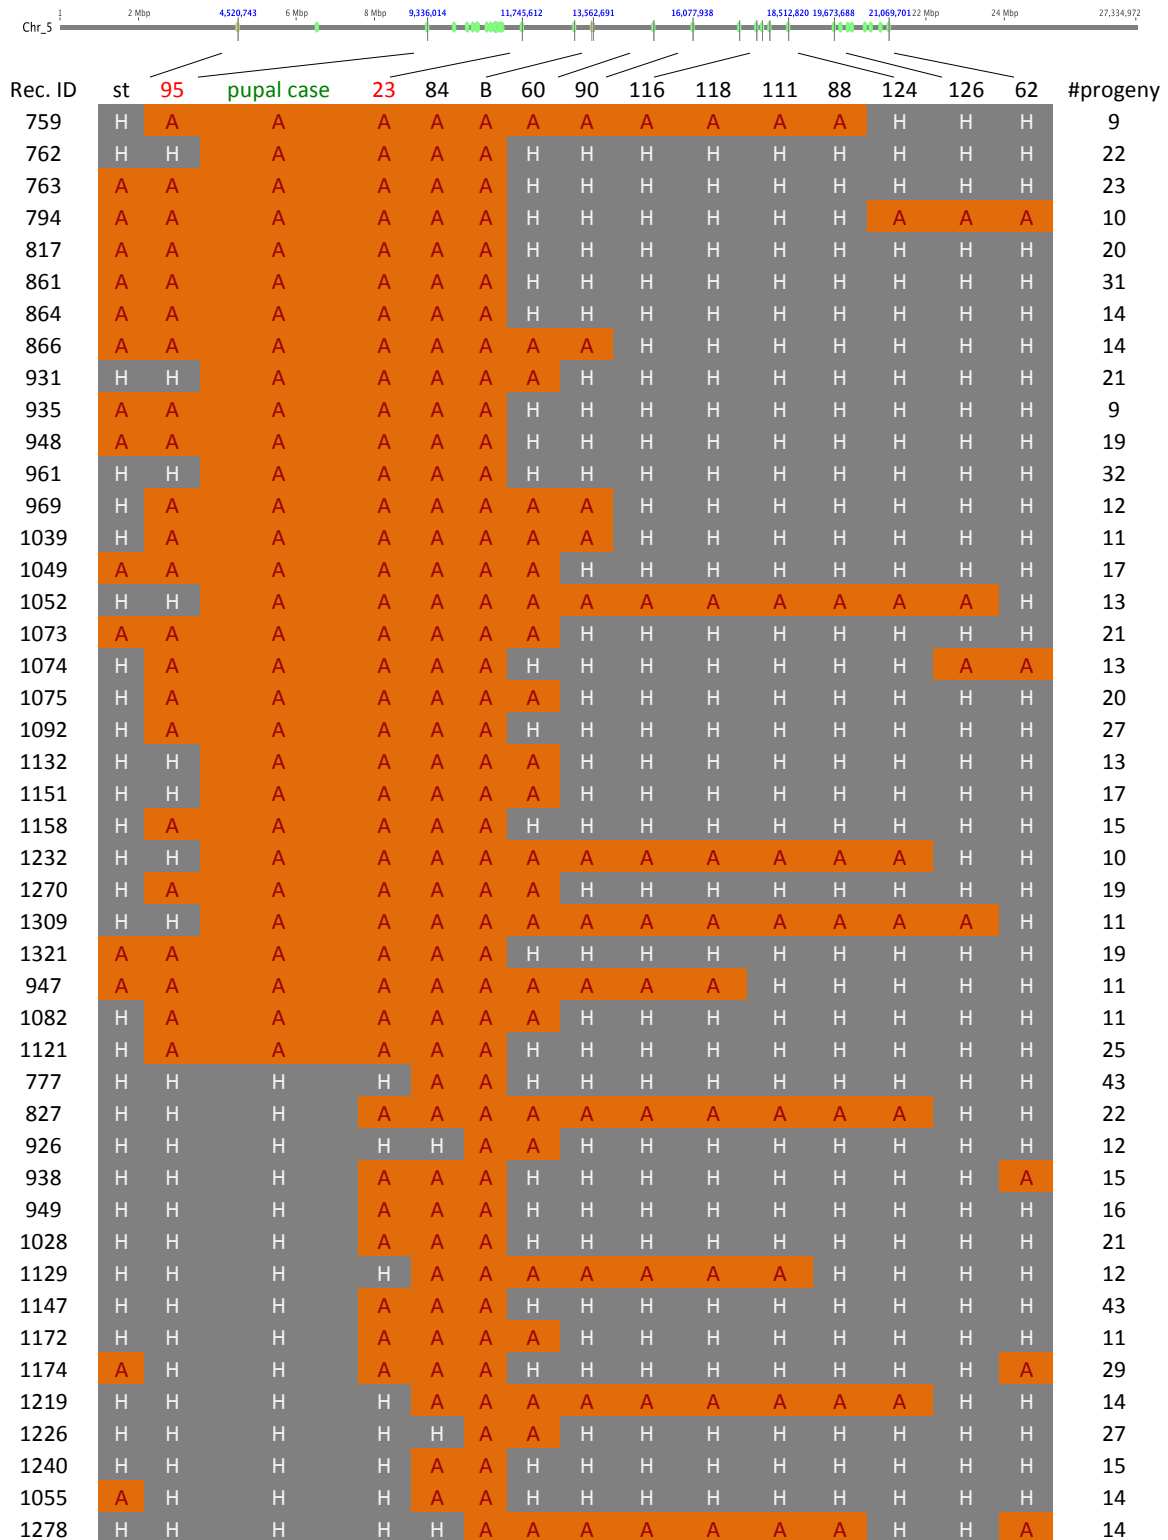

**Figure S2:** Genotype table of recombinant backcross males from the first round of genotyping (see Materials and Methods). Genotypes at each marker are indicated by letter and color (orange/A = *D. americana* homozygote, gray/H = heterozygote). Pupal case genotype is inferred from progeny pupal case colors and is indicated at the putative location (green) between markers SSR95 and SSR23 (red).
