# Supplementary material
Source: PubMed Central journal article supplement (PMC4423374)
Supplement: supp_115.174920_FigureS3.pdf [file supp_115.174920_FigureS3.pdf]

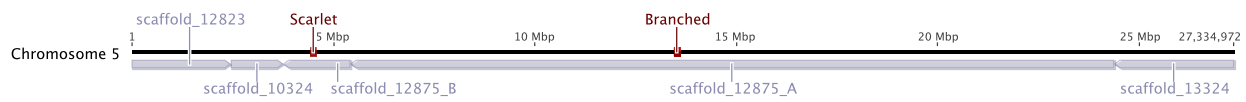

**Figure S3:** Correspondence of *D. virilis* genome scaffolds (release droVir2, UCSC) to chromosome 5 (Muller Element C; Schaffer *et al.* 2008).
