# Supplementary material
Source: PubMed Central journal article supplement (PMC4423374)
Supplement: supp_115.174920_FigureS4.pdf [file supp_115.174920_FigureS4.pdf]

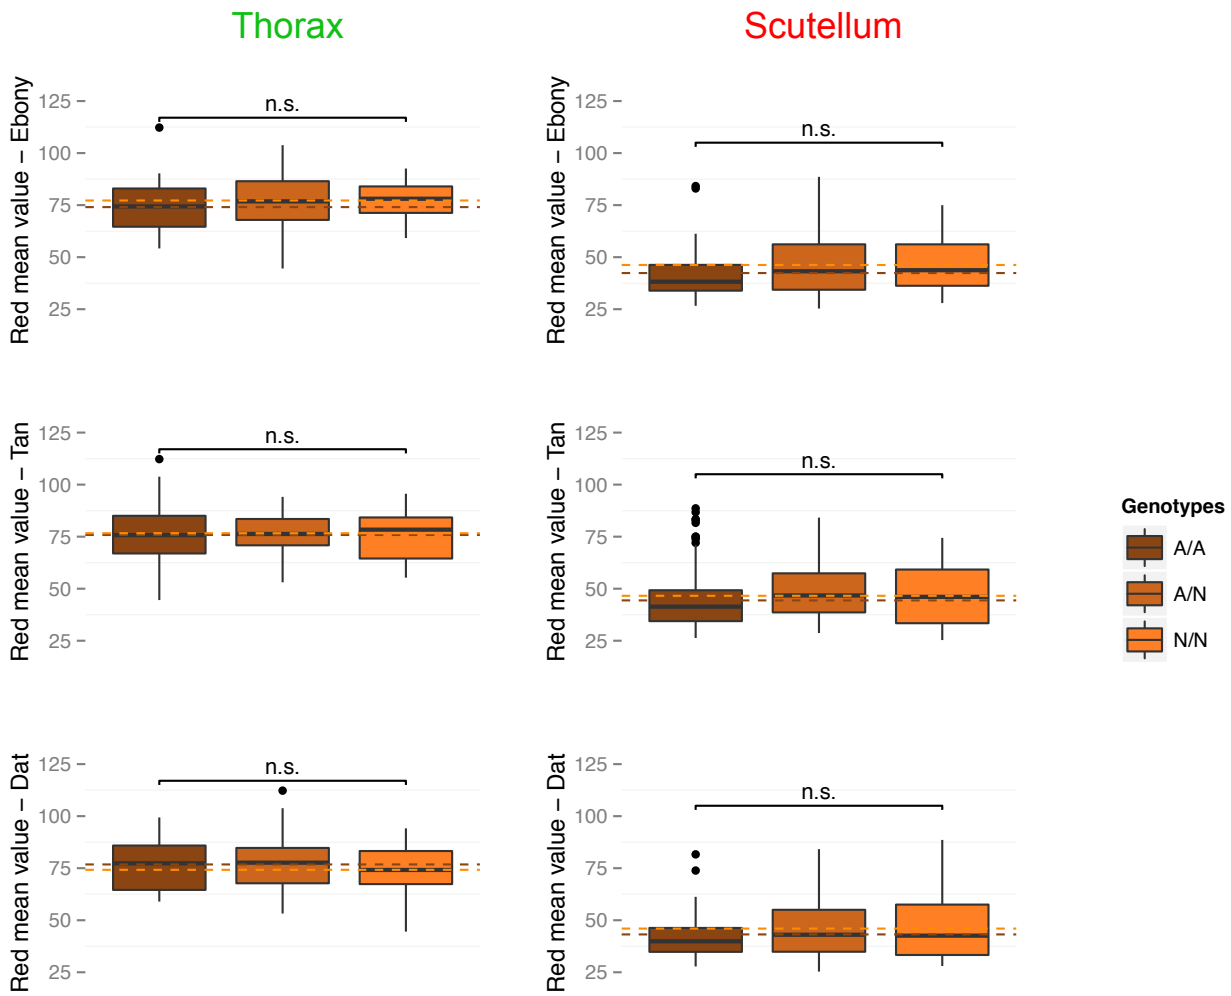

**Figure S4:** Boxplot distribution of mean red values in the thorax and scutellum across genotypes for the three pigmentation genes surveyed: Red mean values are partitioned into the three genotypic classes recovered in the F6 population (n=188). Dashed horizontal lines indicate the mean read value for A/A (brown) and N/N (orange) genotypes.
