# Supplementary material
Source: PubMed Central journal article supplement (PMC4423374)
Supplement: supp_115.174920_TableS1.pdf [file supp_115.174920_TableS1.pdf]

**Table S1:** List of genetic markers used in this study, their coordinates, and primer sequences.

| Name(type*)        | Chr_5 coords.     | scaffold_12875 coords. | Forward primer        | Reverse primer         |
|--------------------|-------------------|------------------------|-----------------------|------------------------|
| <b>St (VM)</b>     | 4519096-4520743   | 922609-924256          | N/A                   | N/A                    |
| <b>SSR58 (MS)</b>  | 6545087-6545300   | 19509634-19509847      | TGCCTAGCATTTGGCACTTA  | AAAAGAGCGTGGCAAAGAAA   |
| <b>SSR95 (MS)</b>  | 9335798-9336014   | 16718920-16719136      | TGTGCCTGCTGACAAAACAT  | ACACTGCCTGCTTGCAATTA   |
| <b>SSR138 (MS)</b> | 10017486-10017694 | 16037240-16037448      | TCGTACCAATGTTGTCAATGC | ACAGGAAGTGGGTGGAAGTG   |
| <b>SSR139 (MS)</b> | 10361473-10361687 | 15693247-15693461      | CAAAGATGGAGGAAGCCTCA  | CCAGCGCACACTCATAGATT   |
| <b>SSR157 (MS)</b> | 10504504-10504720 | 15550214-15550430      | TTTCGTTTGCAATTCCTGTG  | GCGTTCGAACCTGAACAAAT   |
| <b>SSR155 (MS)</b> | 10604771-10604976 | 15449958-15450163      | TGGGACAAATGTGCCAAATA  | ATATGCTCGGTGCGGAGATTC  |
| <b>SSR154 (MS)</b> | 10621121-10621371 | 15433563-15433813      | CGGGCAGAATCAACTCGTAG  | CCGCAGACACTGAACCAAC    |
| <b>SSR150 (MS)</b> | 10864161-10864552 | 15190382-15190773      | GCTATGTTTGCTGGCAGTGA  | ATTGCCAAAGCGCATAAATA   |
| <b>SSR149 (MS)</b> | 10955634-10955876 | 15099058-15099300      | CAGTACATCGGGCAATTGTG  | TGTGGGTGAAGTCAATGTTGT  |
| <b>SSR148 (MS)</b> | 11054476-11054716 | 15000218-15000458      | ACGTGCCACATTGCTCATA   | ACAACCTGTCGCGCACTAAA   |
| <b>SSR170 (MS)</b> | 11062637-11062844 | 14992090-14992297      | TTTTTCGTTTTCTCCGTTTTT | ATCTAAGCAAGCGGGTTTCA   |
| <b>SSR169 (MS)</b> | 11067738-11067901 | 14987033-14987196      | CATCAAGGAGCTGGCCTATC  | ACTTCTCCGCGTACAACCTG   |
| <b>SSR168 (MS)</b> | 11080856-11080998 | 14973936-14974078      | CTCCTGGCTGAAAAGCAAAC  | CGGCAAAACAAATGACAATC   |
| <b>SSR165 (MS)</b> | 11083472-11083698 | 14971236-14971462      | TTTGACCAGGGCATGACATA  | AAGCACAAGCAAAGCACACAC  |
| <b>SSR167 (MS)</b> | 11086448-11086593 | 14968341-14968486      | TTTCAATTTCCGCTTGATTT  | TATAGCCGGCTCGTTGAAGT   |
| <b>pF10 (SNP)</b>  | 11089640-11089848 | 14965086-14965294      | AGCTTTAGCTTCCCTTGTC   | TTGAAATTTGCGCGTCTAC    |
| <b>pE10 (SNP)</b>  | 11090368-11090570 | 14964364-14964566      | CGCGATCGCAGCTATTCTT   | TCCAGGTGTCGGTGAAGTGT   |
| <b>pD10 (SNP)</b>  | 11091748-11091976 | 14962958-14963186      | TCGACGACGACATATTGAGC  | GTCTGGCTTTCATCTAAGAGCA |
| <b>pC10 (SNP)</b>  | 11093207-11093456 | 14961478-14961727      | AGGGATCGGCCAATTATC    | AAACCCCTCAAGGACAACCTG  |
| <b>pB10 (SNP)</b>  | 11095456-11095683 | 14959251-14959478      | TACGCAACGCCTATCTGAAA  | TCAAGCTGTCGTGTAATCC    |
| <b>pA10 (SNP)</b>  | 11096841-11097053 | 14957881-14958093      | GATCGTCGCGACTTTCATA   | CGATGGGCAATAATATGGAG   |
| <b>SSR164 (MS)</b> | 11099701-11099906 | 14955028-14955233      | TTGTGTTGTGCTGATGCTG   | GCAAAGCAAAGCTGCGTA     |
| <b>SSR147 (MS)</b> | 11129608-11129795 | 14925139-14925326      | TTAGGCGCTGCTACTCACAC  | GCGTACAGCTGATAAGCACAG  |
| <b>SSR163 (MS)</b> | 11179710-11179876 | 14875058-14875224      | TCAATGCACGAAAATTGGTC  | GTTGCGGTAAAATGGATTCCG  |
| <b>SSR162 (MS)</b> | 11205769-11205921 | 14849013-14849165      | AGGTAATGTTGGCCAATGC   | TTCGAAAGGCATTTTGTGTA   |
| <b>SSR146 (MS)</b> | 11245420-11245584 | 14809350-14809514      | GTGACAATTGTTGCGGAGTG  | CGCCGTCTGAAAAGAGAAAAC  |
| <b>SSR23 (MS)</b>  | 11745404-11745612 | 14309322-14309530      | AAACTGGCAGATGGGCATAG  | CCACGATTTGAGAAGCACAA   |
| <b>SSR84 (MS)</b>  | 13073885-13074040 | 12980894-12981049      | CAGCATGGAGCATCTGTGTC  | TGGAAGGGATGTCATGGACT   |
| <b>B (VM)</b>      | 13512463-13562691 | 12492265-12542347      | N/A                   | N/A                    |
| <b>SSR60 (MS)</b>  | 15084664-15084836 | 10970098-10970270      | CAAAAGTGTGCTTGATGG    | GGGTTCTAGCCCCAAATAA    |
| <b>SSR90 (MS)</b>  | 16077689-16077938 | 9976996-9977245        | ACTTTGCCAAGCTGTGAAGG  | GCGTCTCGTATGCTCTGCTA   |
| <b>SSR116 (MS)</b> | 17269263-17269460 | 8785474-8785671        | CCCCATTGAAAGTTCATCCA  | GTCAGGAGGCCACATTGTTT   |
| <b>SSR118 (MS)</b> | 17695072-17695271 | 8359663-8359862        | GCCCAAAATCTTAGCCAAA   | TGGCTTGGGTACTGTTTCT    |
| <b>SSR111 (MS)</b> | 17849127-17849347 | 8205587-8205807        | TTTGATTGTTTCCCTCACTCG | TGTCATTGCTCTGGCAAAA    |
| <b>SSR88 (MS)</b>  | 18040111-18040269 | 8014665-8014823        | CCAAAAGGCAGGACCATAAA  | TTGCGTAGACACCACAAGGT   |
| <b>SSR124 (MS)</b> | 18512607-18512820 | 7542114-7542327        | CGCTTAAACGATCCAACGAT  | GTTTATAACCGGTGCTCGAT   |
| <b>SSR126 (MS)</b> | 19673479-19673688 | 6381246-6381455        | AATTGCCAAAGAAACCACCA  | AGCGGCTCGTCTGCTGTA     |
| <b>SSR128 (MS)</b> | 19839381-19839552 | 6215382-6215553        | ACGACTTGTGCTGATAGGC   | CTGTTCTGGAACATGCAAGC   |
| <b>SSR129 (MS)</b> | 20026180-20026357 | 6028577-6028754        | ACCATGAGCAGGCATCAGA   | CCGGCAATCGTCTTTAACT    |
| <b>SSR130 (MS)</b> | 20129136-20129321 | 5925613-5925798        | ACACAGGTCCCAACACAACA  | CAGAAAATGATGTGCGTCTG   |
| <b>SSR133 (MS)</b> | 20473430-20473645 | 5581289-5581504        | CTCGCAACTTGGCAGACATA  | TGCCCAAATGTAAGTGTATC   |
| <b>SSR134 (MS)</b> | 20601881-20602035 | 5452899-5453053        | GCACCGCCATACCCATAAT   | ATTTGGCCACCCATTAGACC   |
| <b>SSR136 (MS)</b> | 20858440-20858624 | 5196310-5196494        | ATGCCAAACAATGCTAAACA  | TCCCGATGATCATTGTCTT    |
| <b>SSR62 (MS)</b>  | 21069407-21069701 | 4985233-4985527        | TGTTAGTTGGCAGCGCAAT   | GATTATGCGTGTGCGAGTCC   |

\*VM: visible marker, MS: microsatellite marker, SNP: single nucleotide polymorphism.
