# Supplementary material
Source: PubMed Central journal article supplement (PMC4423374)
Supplement: supp_115.174920_TableS2.pdf [file supp_115.174920_TableS2.pdf]

**Table S2:** Statistical analysis of RT-qPCR results. Two sample *t*-tests (one-tailed) for each relevant comparison are shown. Significant *p*-values (<0.05) are indicated in red.

| Samples compared (isoform) | t-value | <i>p</i> -value | Associated figure |
|----------------------------|---------|-----------------|-------------------|
| Apré v. Vpre (A)           | 17.54   | <0.00001        | 5b                |
| Apup v. Vpup (A)           | 35.19   | <0.00001        | 5b                |
| Apos v. Vpos (A)           | 5.69    | 0.00046         | 5b                |
| Apré v. Vpre (B)           | 4.63    | 0.00169         | 5b                |
| Apup v. Vpup (B)           | 0.31    | 0.76582         | 5b                |
| Apos v. Vpos (B)           | 2.99    | 0.01739         | 5b                |
| Apré v. F1pre (A)          | 1.49    | 0.13674         | 5c                |
| Apup v. F1pup (A)          | 0.27    | 0.40072         | 5c                |
| Apos v. F1pos (A)          | 2.21    | 0.07916         | 5c                |
| Vpre v. F1pre (A)          | 7.29    | 0.00915         | 5c                |
| Vpup v. F1pup (A)          | 25.46   | 0.00081         | 5c                |
| Vpos v. F1pos (A)          | 2.88    | 0.05133         | 5c                |
| Apos v. F3Br (A)           | 2.05    | 0.05457         | 5c                |
| Vpos v. F3Bl (A)           | 2.45    | 0.06719         | 5c                |
| Apré v. Npre (A)           | 1.67    | 0.11882         | 5d                |
| Apup v. Npup (A)           | 1.91    | 0.09801         | 5d                |
| Apos v. Npos (A)           | 1.89    | 0.10008         | 5d                |
| Apré v. Lpre (A)           | 7.92    | 0.00778         | 5d                |
| Apup v. Lpup (A)           | 29.88   | 0.00056         | 5d                |
| Apos v. Lpos (A)           | 32.38   | 0.00048         | 5d                |
| Lpre v. Npre (A)           | 13.38   | 0.00277         | 5d                |
| Lpup v. Npup (A)           | 36.6    | 0.00037         | 5d                |
| Lpos v. Npos (A)           | 8.02    | 0.00761         | 5d                |
| Lpre v. Vpre (A)           | 0.23    | 0.42108         | 5d                |
| Lpup v. Vpup (A)           | 2.72    | 0.05652         | 5d                |
| Lpos v. Vpos (A)           | 2.84    | 0.05235         | 5d                |
