# Supplementary material
Source: PubMed Central journal article supplement (PMC4423374)
Supplement: supp_115.174920_TableS3.pdf [file supp_115.174920_TableS3.pdf]

**Table S3:** Statistical analysis of adult pigmentation between *D. americana* and *D. novamexicana*. One-way ANOVA was performed for genotype at each of the three genes and mean red value at three adult landmarks. Significant *p*-values (<0.05) are indicated in red.

| <b>Tukey HSD adjusted <i>p</i>-value</b> |                 |                |                   |            |            |            |
|------------------------------------------|-----------------|----------------|-------------------|------------|------------|------------|
| <b>Gene</b>                              | <b>Landmark</b> | <b>F value</b> | <b>Pr (&gt;F)</b> | <b>N-A</b> | <b>H-A</b> | <b>N-H</b> |
| <b><i>ebony</i></b>                      | Abdomen         | 4.969          | 0.00244           | 0.00221    | 0.0389     | 0.31829    |
|                                          | Scutellum       | 0.799          | 0.496             | 0.59866    | 0.46525    | 0.99959    |
|                                          | Thorax          | 0.558          | 0.644             | 0.61987    | 0.74585    | 0.96329    |
| <b><i>tan</i></b>                        | Abdomen         | 4.85           | 0.00285           | 0.12649    | 0.07594    | 0.00205    |
|                                          | Scutellum       | 0.935          | 0.425             | 0.89283    | 0.4431     | 0.91896    |
|                                          | Thorax          | 0.177          | 0.912             | 0.99757    | 0.99912    | 0.99423    |
| <b><i>Dat</i></b>                        | Abdomen         | 0.162          | 0.922             | 0.93054    | 0.98801    | 0.97699    |
|                                          | Scutellum       | 0.17           | 0.916             | 0.94041    | 0.89818    | 0.99981    |
|                                          | Thorax          | 0.692          | 0.558             | 0.66698    | 0.99866    | 0.55199    |

References:

Schaeffer, S. W. *et al.*, 2008 Polytene Chromosomal Maps of 11 *Drosophila* Species: The Order of Genomic Scaffolds Inferred From Genetic and Physical Maps. *Genetics* 179:1601-1655.
